# Supplementary material
Source: Springer Nature journal article supplement (https://www.springermedizin.de/resource/supplementary/12888_2011_963_MOESM2_ESM.pdf/9479536)

## Treatment responders (a)

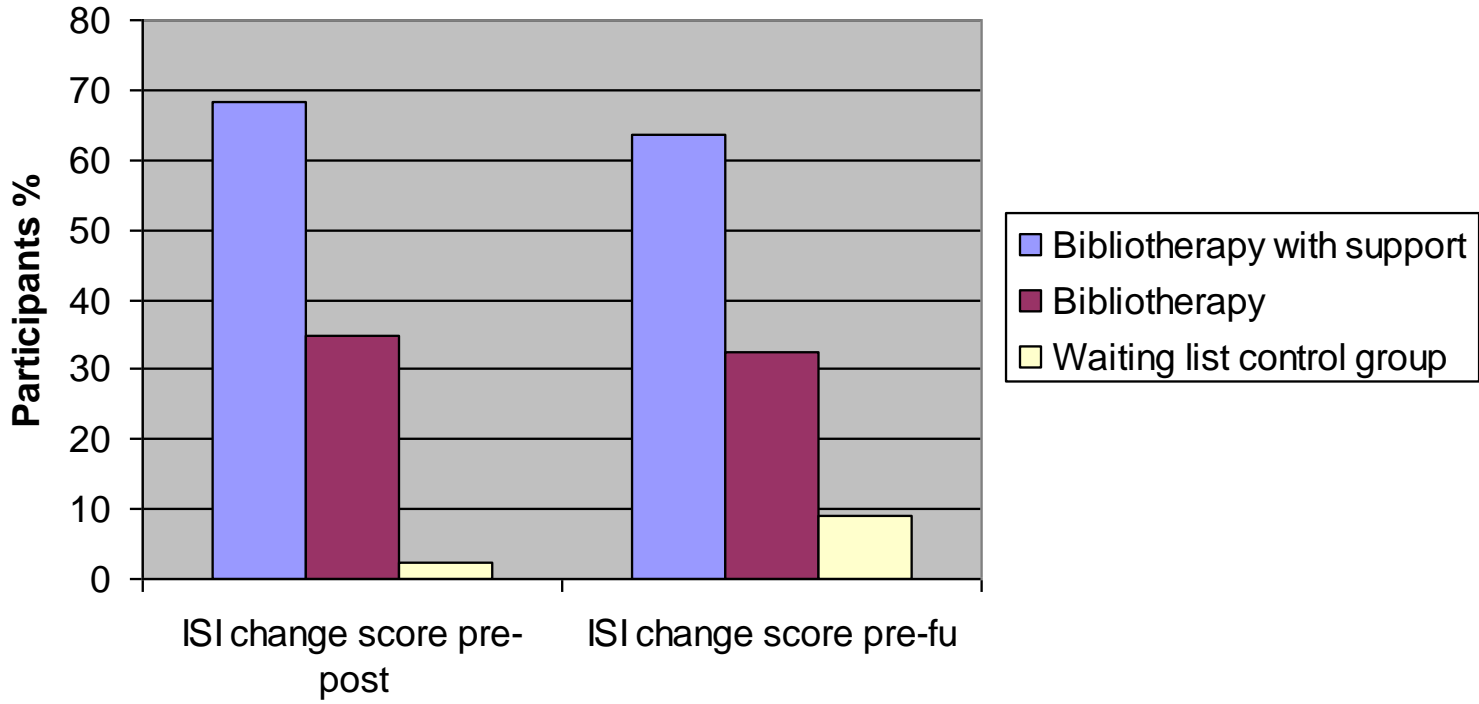

## Treatment remitters (b)

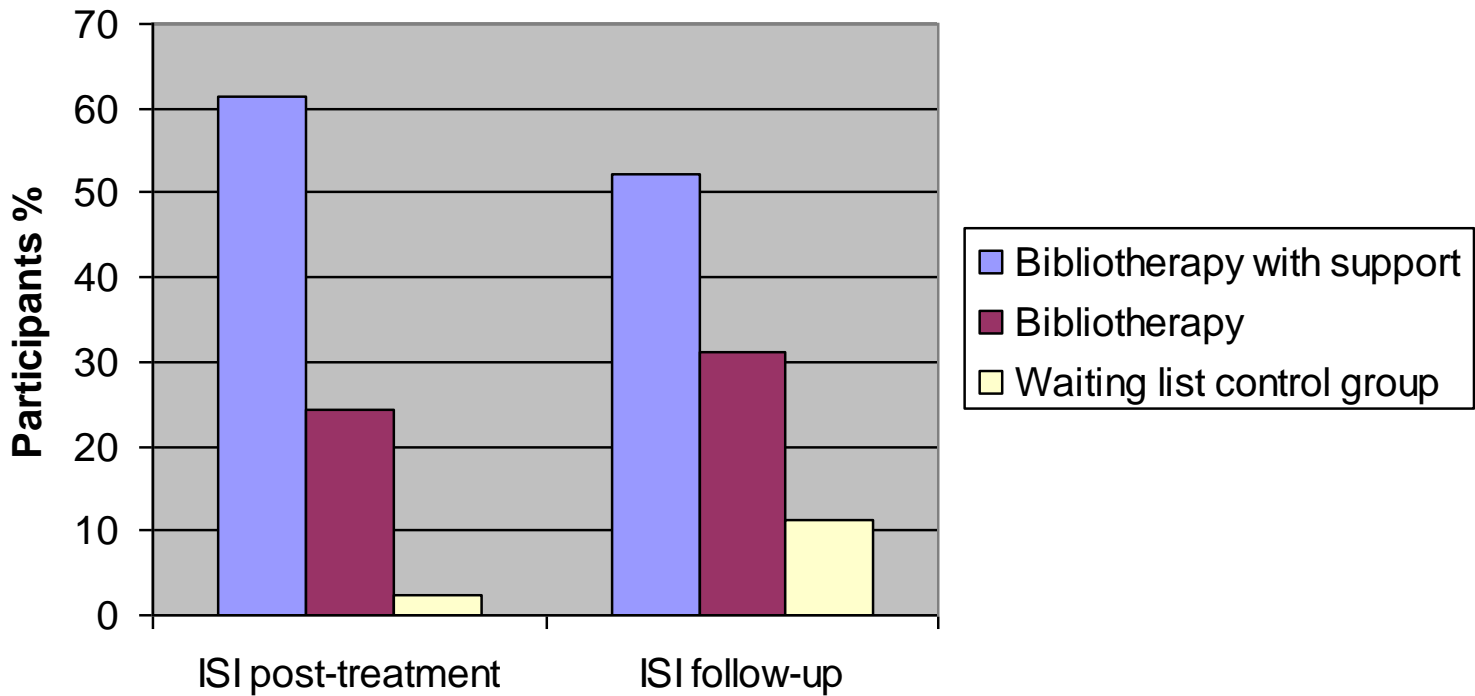

Supplement: MOESM2 [file 9479536]
